# Supplementary material
Source: Springer Nature journal article supplement (https://www.springermedizin.de/resource/supplementary/12916_2011_528_MOESM5_ESM.pdf/9598108)

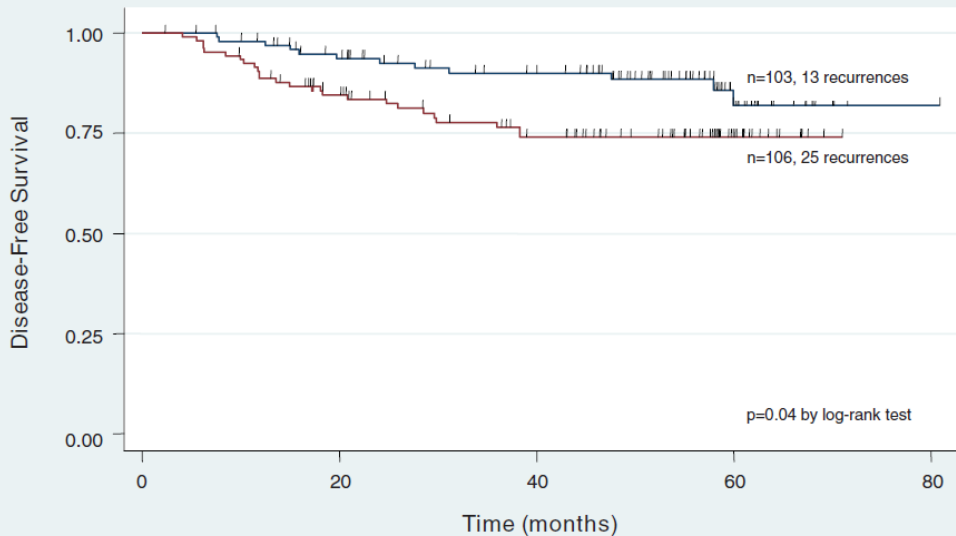

Number at risk

|            |     |    |    |    |   |
|------------|-----|----|----|----|---|
| ≤3.7 ng/ml | 103 | 85 | 68 | 21 | 1 |
| >3.7 ng/ml | 106 | 81 | 58 | 19 | 0 |

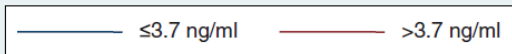

Supplement: MOESM5 [file 9598108]
